# Supplementary material for: Modulating cellular behaviors through surface nanoroughness
Source: Royal Society of Chemistry journal article supplement (doi:10.1039/c2jm32007j), 2012-01-01
Supplement: c2jm32007j.pdf [file c2jm32007j.pdf]

Support Information:

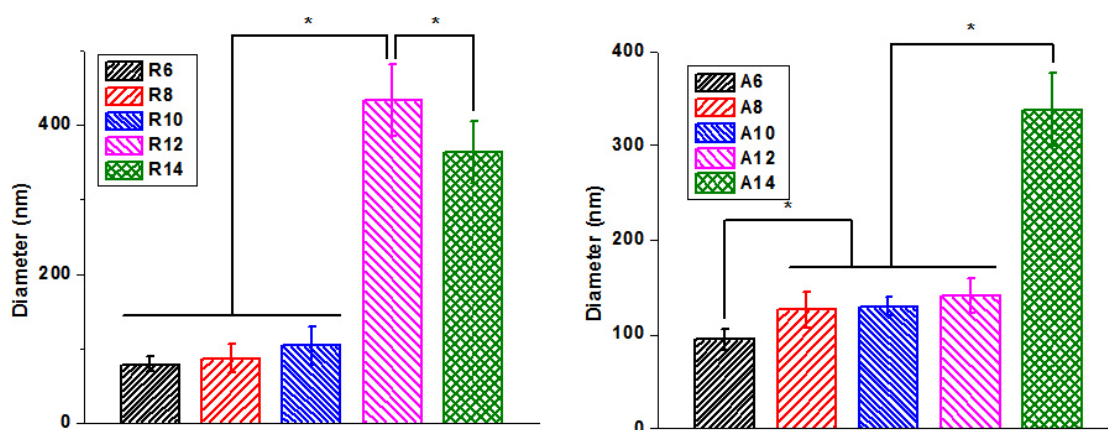

Fig. S1. The average fiber diameters of all nanofibers membranes. \* stands for significant difference.

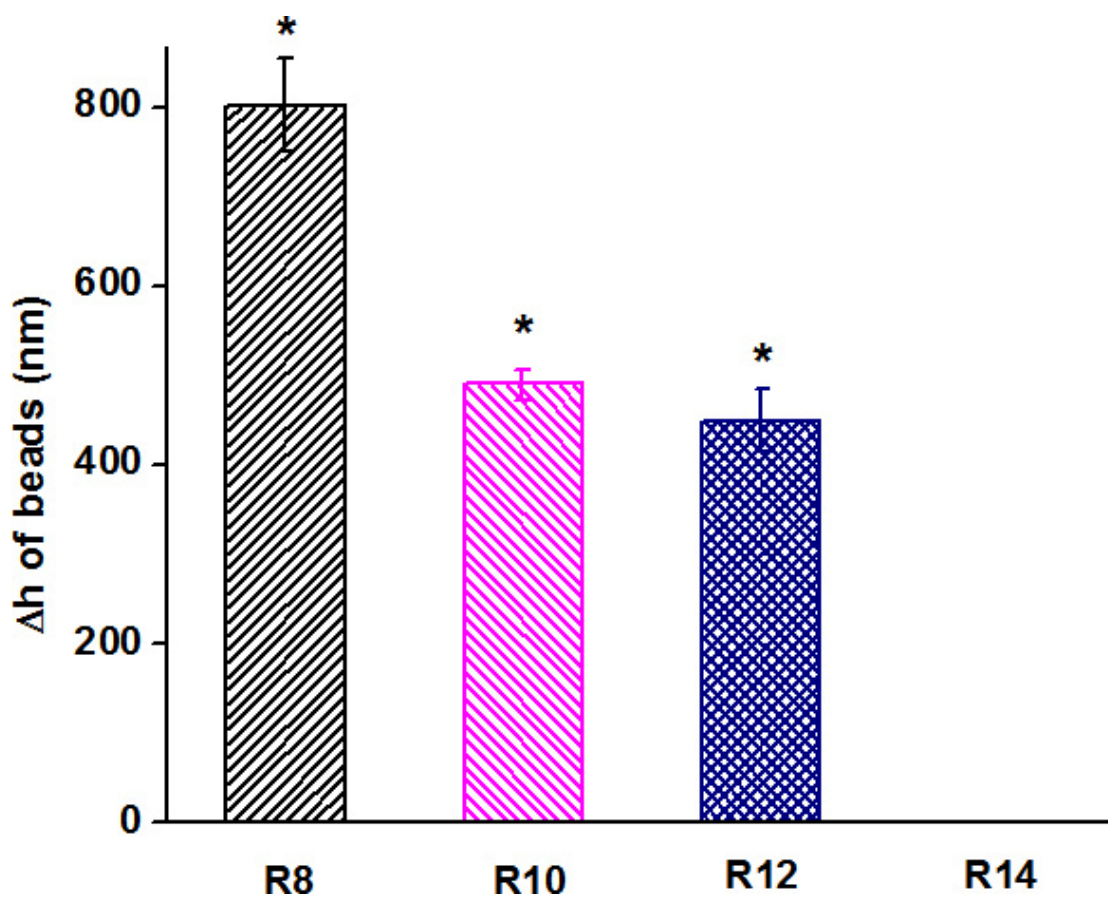

Fig. S2.  $\Delta h$  of beads for R8, R10, R12 and R14. \* stands for significant difference.

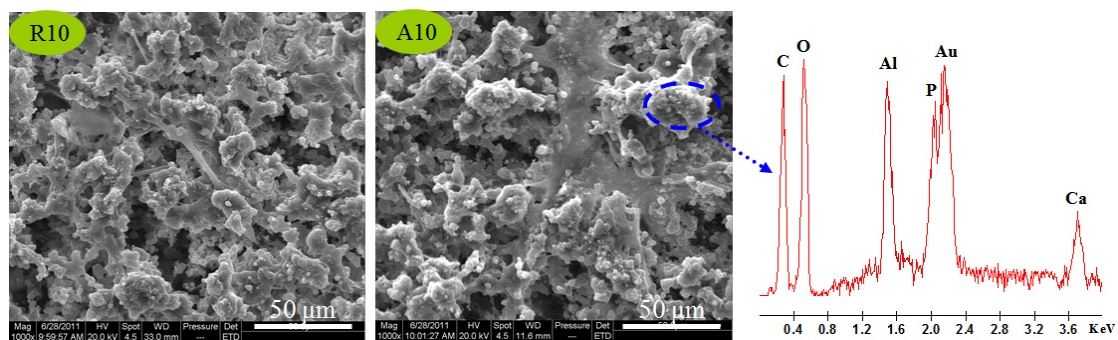

**Fig. S3.** Calcium deposits observed with scanning electron microscopy and energy dispersive X-ray spectrometer (EDX) spectra after 21 days' induction.
